# Supplementary material for: The synergistic effect of topography and stiffness as a crack engineering strategy for stretchable electronics
Source: Royal Society of Chemistry journal article supplement (doi:10.1039/d2tc03459j), 2022-11-30
Supplement: d2tc03459j1.pdf [file d2tc03459j1.pdf]

# The Synergistic Effect of Topography and Stiffness as a Crack Engineering Strategy for Stretchable Electronics

*Sara Mechael, Gloria M. D'Amaral, Yunyun Wu, Kory Schlingman, Brittany Ives, R. Stephen  
Carmichael, and Tricia Breen Carmichael\**

Department of Chemistry and Biochemistry, University of Windsor, Windsor, Ontario, Canada

N9B 3P4

\*Email: [tbcarmic@uwindsor.ca](mailto:tbcarmic@uwindsor.ca)

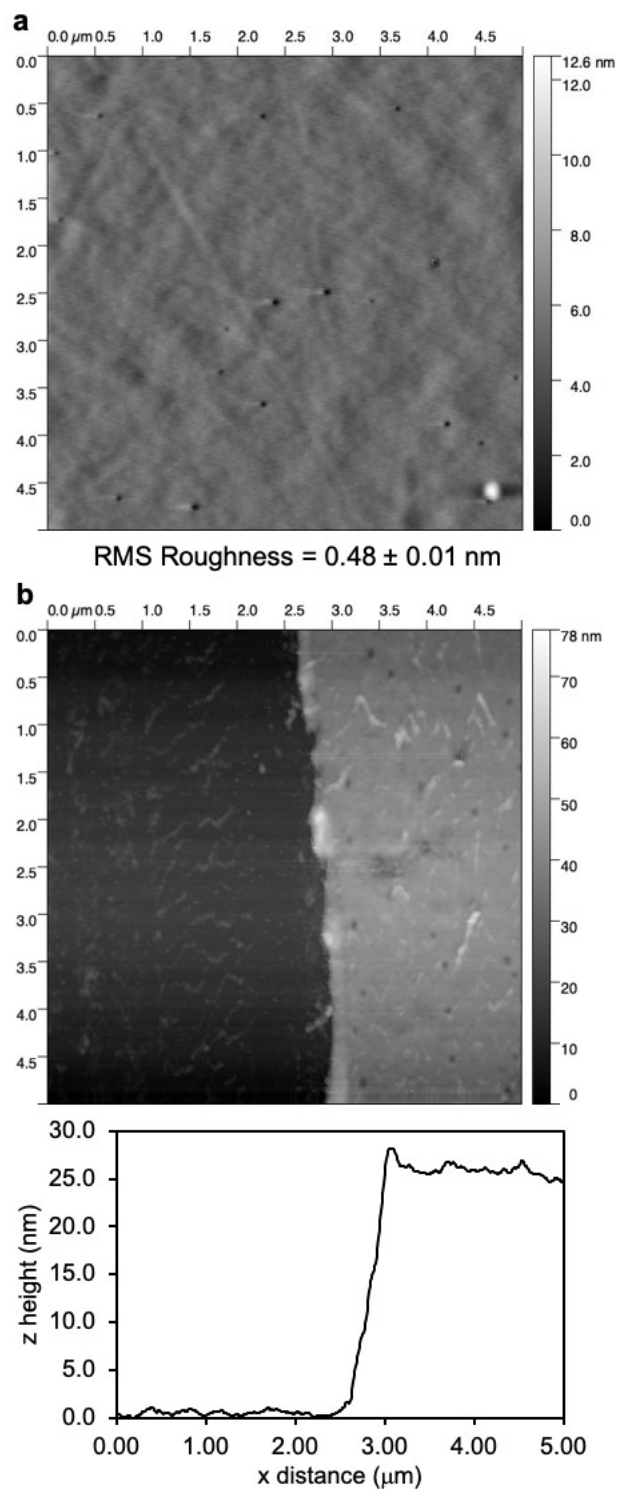

**Figure S1.** AFM characterization of PDMS/PVAc<sub>planar</sub>. **(a)** AFM image of the PDMS/PVAc<sub>planar</sub> surface, **(b)** AFM image of a PVAc film step on glass with the corresponding plot of the film thickness.

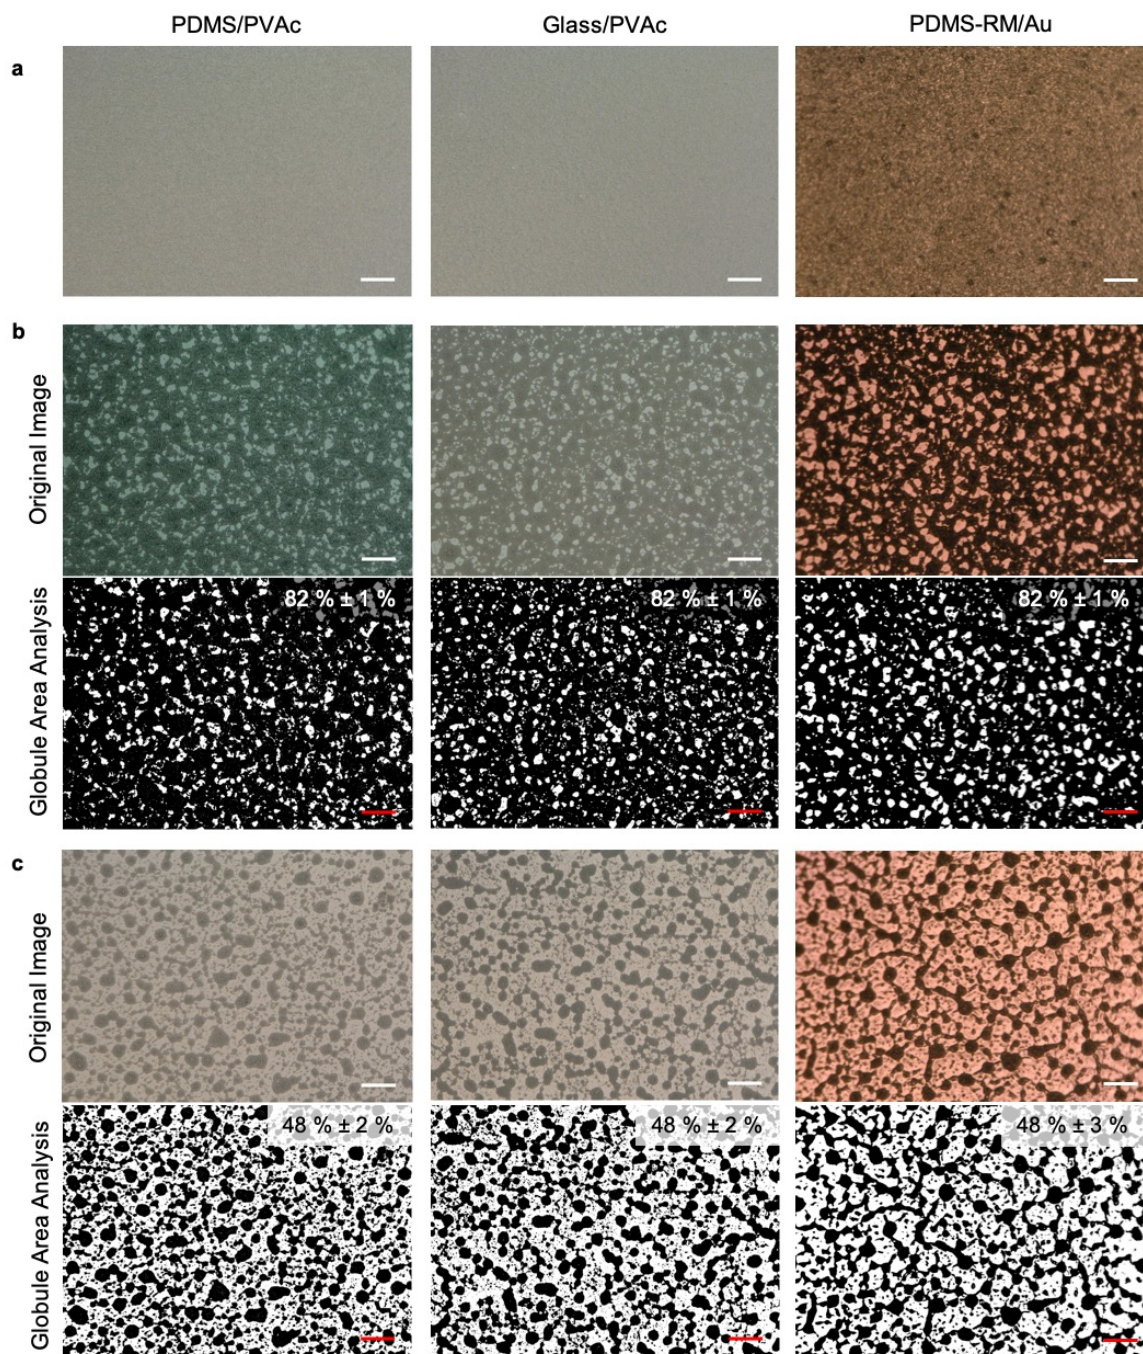

**Figure S2.** Optical microscope images and the corresponding image analysis showing topographical coverage in PDMS/PVAc, glass/PVAc, and PDMS-RM/PVAc when the samples are prepared from PVAc dilutions of (a) 1:1, (b) 3:1, and (c) 5:1 water:glue (v:v). Scale bars are 50  $\mu\text{m}$ .

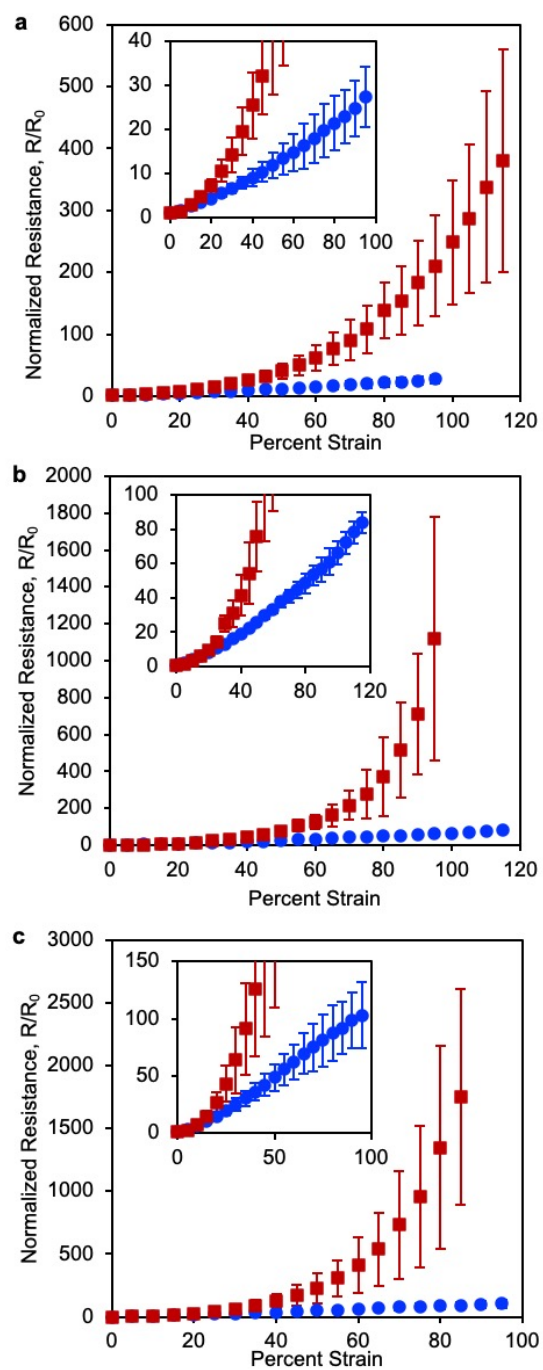

**Figure S3.** Plots of change in resistance with elongation of PDMS/PVAc/Au (red squares) and PDMS-RM/Au (blue circles) systems with **(a)** 100%, **(b)** 82%, and **(c)** 48% topographical coverage. Data points in the plots represent average  $R/R_0 \pm$  standard deviation of at least 3 samples.

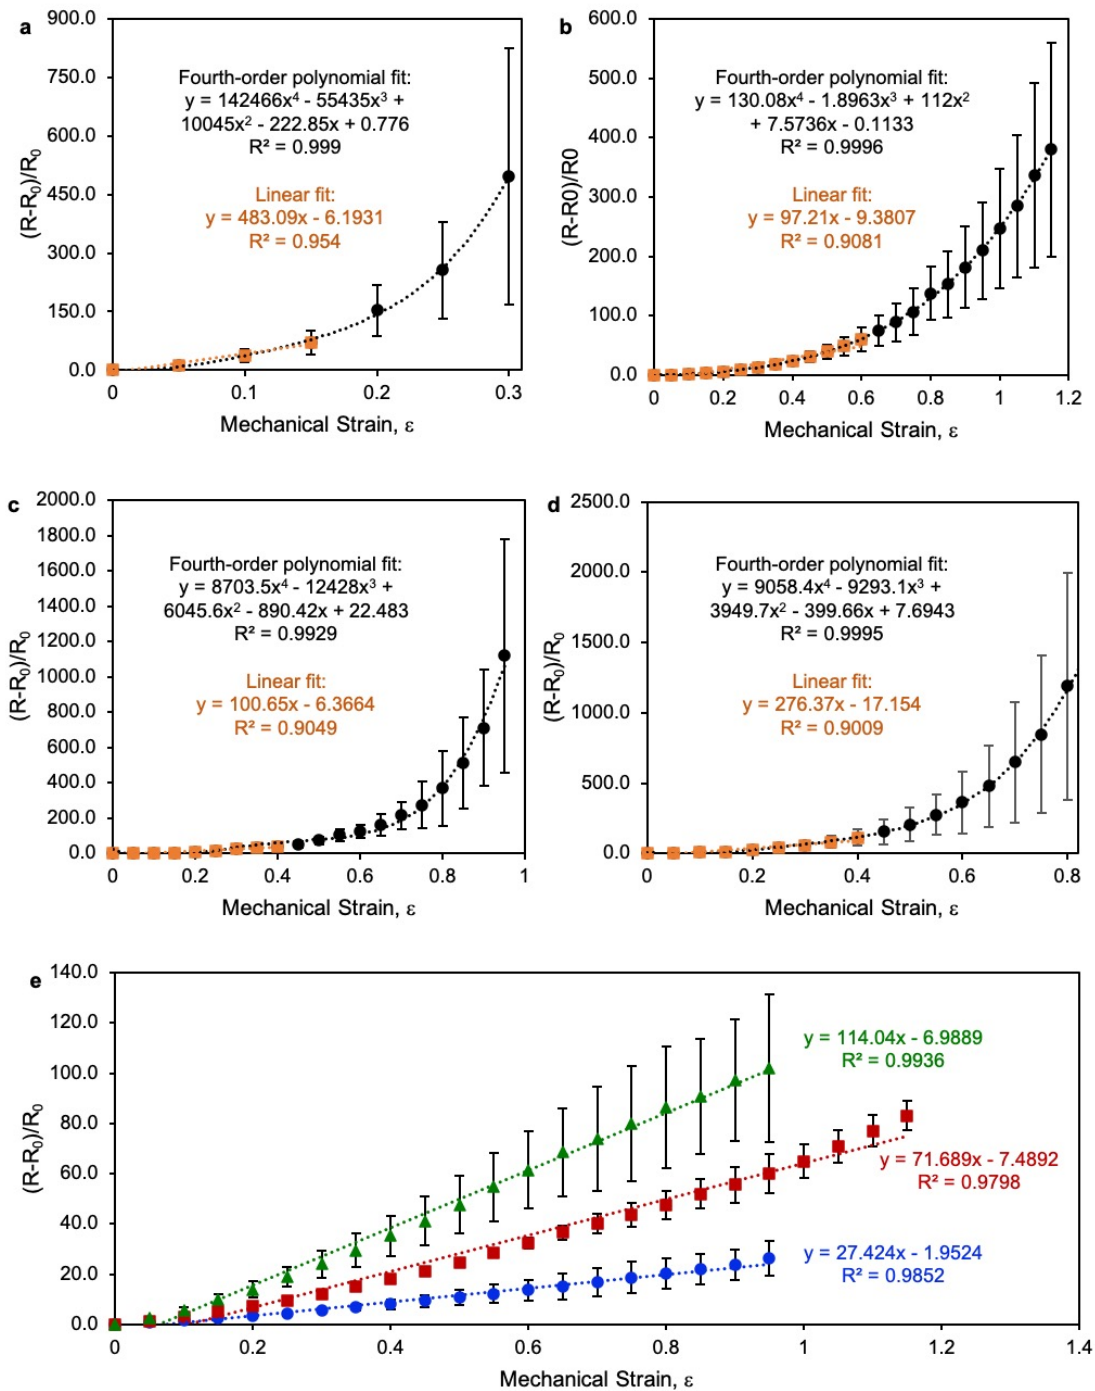

**Figure S4.** Plots and fits of  $(R-R_0)/R_0$  with increasing mechanical strain of **(a)**

PDMS/PVAc<sub>planar</sub>/Au, **(b)** PDMS-RM<sub>100</sub>/Au **(c)** PDMS-RM<sub>82</sub>/Au, **(d)** PDMS-RM<sub>48</sub>/Au, and **(e)**

PDMS/PVAc/Au with 100% PVAc coverage (blue circles), 82% PVAc coverage (red squares),



and 48% PVAc coverage (green triangles). Data points in the plots represent average  $R/R_0 \pm$  standard deviation of at least 3 samples.

**Table S1.** Gauge factors and working ranges of reported strain sensing systems

| Sensor Material                                                     | Gauge Factor | Linear Working Range | Reference                                 |
|---------------------------------------------------------------------|--------------|----------------------|-------------------------------------------|
| PDMS/PVAc <sub>48</sub> /Au                                         | 114          | 0 – 95 %             | This work                                 |
| PDMS/PVAc <sub>82</sub> /Au                                         | 72           | 0 – 100 %            | This work                                 |
| PDMS/PVAc <sub>100</sub> /Au                                        | 27           | 0 – 95 %             | This work                                 |
| Au film on nitrile butadiene rubber                                 | 62           | 0 – 40 %             | Mecheal, S., <i>et al.</i> <sup>1</sup>   |
| AuNPs on PDMS                                                       | 2.05         | 0 – 20 %             | Lee, J., <i>et al.</i> <sup>2</sup>       |
| Au film on PET                                                      | 1600         | 0 – 2 %              | Lee, T., <i>et al.</i> <sup>3</sup>       |
| AgNWs on latex                                                      | 6.9          | 0 – 50 %             | Gong, S., <i>et al.</i> <sup>4</sup>      |
| AgNWs on PDMS                                                       | 5            | 0 – 60 %             | Amjadi, M., <i>et al.</i> <sup>5</sup>    |
| AgNWs on PDMS                                                       | 24.6         | 0 – 130 %            | Kim, K-H, <i>et al.</i> <sup>6</sup>      |
| ZnO NWs on polystyrene                                              | 116          | 0 – 50 %             | Xiao, X., <i>et al.</i> <sup>7</sup>      |
| CNT fibers on Ecoflex                                               | 0.56         | 0 – 200 %            | Ryu, S., <i>et al.</i> <sup>8</sup>       |
| CNTs on ecoflex                                                     | 1.75         | 0 – 100 %            | Amjadi, M., <i>et al.</i> <sup>9</sup>    |
| CNTs on PDMS                                                        | 0.82         | 0 – 40 %             | Yamada, T., <i>et al.</i> <sup>10</sup>   |
| Graphene nanoribbons on polyurethane                                | 7.9          | 0 – 60 %             | Tan, C., <i>et al.</i> <sup>11</sup>      |
| Graphene nanocellulose paper                                        | 7.1          | 0 – 100 %            | Yan, C., <i>et al.</i> <sup>12</sup>      |
| Graphene foam                                                       | 15           | 0 – 77 %             | Jeong, Y. R., <i>et al.</i> <sup>13</sup> |
| Graphene foam PDMS                                                  | 98.66        | 0 – 5 %              | Li, J., <i>et al.</i> <sup>14</sup>       |
| Reduced graphene oxide (rGO) polyethylenimine layered nanocomposite | 754          | 0 – 5 %              | Ye, X., <i>et al.</i> <sup>15</sup>       |
| rGO-PDMS composite                                                  | 7.2          | 0 – 110 %            | Zheng, Z., <i>et al.</i> <sup>16</sup>    |
| Graphene/carbon black/Ni sponge                                     | 138          | 0 – 16 %             | Sun, S., <i>et al.</i> <sup>17</sup>      |
| Carbon black and PDMS                                               | 5.5          | 0 – 10 %             | Kong, J-H., <i>et al.</i> <sup>18</sup>   |

## References

1. Mecheal, S. S.; Wu, Y.; Chen, Y.; Carmichael, T. B. *iScience* **2021**, 24, (6), 102525.
2. Lee, J.; Kim, S.; Lee, J.; Yang, D.; Park, B. C.; Ryu, S.; Park, I. *Nanoscale* **2014**, 6, (20), 11932-11939.
3. Lee, T.; Choi, Y. W.; Lee, G.; Kim, S. M.; Kang, D.; Choi, M. *RSC Adv.* **2017**, 7, (55), 34810-34815.
4. Gong, S.; Lai, D. T. H.; Su, B.; Si, K. J.; Ma, Z.; Yap, L. W.; Guo, P.; Cheng, W. *Adv. Electron. Mater.* **2015**, 1, (4), 1400063.

5. Amjadi, M.; Pichitpajongkit, A.; Lee, S.; Ryu, S.; Park, I. *ACS Nano* **2014**, 8, (5), 5154-5163.
6. Kim, K.-H.; Jang, N.-S.; Ha, S.-H.; Cho, J. H.; Kim, J.-M. *Small* **2018**, 14, (14), 1704232.
7. Xiao, X.; Yuan, L.; Zhong, J.; Ding, T.; Liu, Y.; Cai, Z.; Rong, Y.; Han, H.; Zhou, J.; Wang, Z. L. *Adv. Mater.* **2011**, 23, (45), 5440-5444.
8. Ryu, S.; Lee, P.; Chou, J. B.; Xu, R.; Zhao, R.; Hart, A. J.; Kim, S.-G. *ACS Nano*.
9. Amjadi, M.; Yoon, Y. J.; Park, I. *Nanotechnol.* **2015**, 26, (37), 375501.
10. Yamada, T.; Hayamizu, Y.; Yamamoto, Y.; Yomogida, Y.; Izadi-Najafabadi, A.; Futaba, D. N.; Hata, K. *Nat. Nanotechnol.* **2011**, 6, (5), 296-301.
11. Tan, C.; Dong, Z.; Li, Y.; Zhao, H.; Huang, X.; Zhou, Z.; Jiang, J.-W.; Long, Y.-Z.; Jiang, P.; Zhang, T.-Y.; Sun, B. *Nat. Commun.* **2020**, 11, (1), 3530.
12. Yan, C.; Wang, J.; Kang, W.; Cui, M.; Wang, X.; Foo, C.; Chee, K.; Lee, P. *Adv. Mater.* **2014**, 26, (13), 2022-2027.
13. Jeong, Y. R.; Park, H.; Jin, S. W.; Hong, S. Y.; Lee, S.-S.; Ha, J. S. *Adv. Funct. Mater.* **2015**, 25, (27), 4228-4236.
14. Li, J.; Zhao, S.; Zeng, X.; Huang, W.; Gong, Z.; Zhang, G.; Sun, R.; Wong, C.-P. *ACS Appl. Mater. Interfaces* **2016**, 8, (29), 18954-18961.
15. Ye, X.; Yuan, Z.; Tai, H.; Li, W.; Du, X.; Jiang, Y. *J. Mater. Chem. C* **2017**, 5, (31), 7746-7752.
16. Zeng, Z.; Seyed Shahabadi, S. I.; Che, B.; Zhang, Y.; Zhao, C.; Lu, X. *Nanoscale* **2017**, 9, (44), 17396-17404.
17. Sun, S.; Liu, Y.; Chang, X.; Jiang, Y.; Wang, D.; Tang, C.; He, S.; Wang, M.; Guo, L.; Gao, Y. *J. Mater. Chem. C* **2020**, 8, (6), 2074-2085.
18. Kong, J.-H.; Jang, N.-S.; Kim, S.-H.; Kim, J.-M. *Carbon* **2014**, 77, 199-207.
